# Supplementary material for: Decontamination Efficacy and Skin Toxicity of Two Decontaminants against Bacillus anthracis
Source: PubMed Central journal article supplement (PMC4578770; doi:10.1371/journal.pone.0138491), 2015-09-22
Supplement: pone.0138491.s001.pdf [file pone.0138491.s001.pdf]

| Microorganism                           | Test substance | Contact time | Replicate 1 | Replicate2 | Replicate 3 |          |
|-----------------------------------------|----------------|--------------|-------------|------------|-------------|----------|
| <i>B. anthracis</i> Stern<br>Endospores | Product        | Sb Ex2       | 1.54E+07    | 1.41E+07   | 1.60E+07    |          |
|                                         |                | Sb Ex1       | 1.16E+07    | 1.40E+07   | 8.80E+06    |          |
|                                         |                | Sb Ex3       | 1.28E+07    | 1.35E+07   | 1.57E+07    |          |
|                                         |                | T2 Ex2       | 7.00E+04    | 6.20E+04   | 3.60E+04    |          |
|                                         |                | T2 Ex1       | 2.80E+04    | 3.00E+04   | 3.00E+04    |          |
|                                         |                | T2 Ex3       | 1.45E+05    | 1.14E+05   | 9.80E+04    |          |
|                                         |                | T5 Ex2       | TFTC (2)    | TFTC (3)   | TFTC        |          |
|                                         |                | T5 Ex1       | TFTC        | TFTC       | TFTC (1)    |          |
|                                         |                | T5 Ex3       | TFTC        | TFTC       | TFTC        |          |
|                                         |                | T10 Ex2      | TFTC        | TFTC       | TFTC        |          |
|                                         |                | T10 Ex1      | TFTC        | TFTC       | TFTC        |          |
|                                         |                | T10 Ex3      | TFTC        | TFTC       | TFTC        |          |
|                                         |                | T30Ex3       | TFTC        | TFTC       | TFTC        |          |
|                                         |                | T30Ex3       | TFTC        | TFTC       | TFTC        |          |
|                                         |                | T30Ex3       | TFTC        | TFTC       | TFTC        |          |
|                                         |                | PBS          | 0 minutes   | 1.47E+07   | 1.43E+07    | 1.77E+07 |
|                                         |                |              | 0mins       | 1.09E+07   | 1.43E+07    | 1.16E+07 |
|                                         |                |              | 0 mins      | 1.48E+07   | 1.40E+07    | 1.31E+07 |
|                                         | 2 minutes      |              | 1.44E+07    | 1.51E+07   | 1.74E+07    |          |
|                                         | 2mins ex1      |              | 1.40E+07    | 1.28E+07   | 9.60E+06    |          |
|                                         | 2 mins ex3     |              | 1.61E+07    | 1.31E+07   | 1.50E+07    |          |
|                                         | 5 minutes ex2  |              | 1.32E+07    | 2.02E+07   | 1.56E+07    |          |
|                                         | 5mins ex1      |              | 9.10E+06    | 1.12E+07   | 1.11E+07    |          |
|                                         | 5 mins ex3     |              | 1.21E+07    | 1.81E+07   | 2.04E+07    |          |
|                                         | 10minutes ex2  |              | 1.63E+07    | 1.50E+07   | 1.53E+07    |          |
|                                         | 10mins ex1     | 1.14E+07     | 1.18E+07    | 8.90E+06   |             |          |
|                                         | 10 mins ex3    | 1.58E+07     | 1.53E+07    | 1.57E+07   |             |          |

| Microorganism                          | Test substance | Contact time      | Replicate 1 | Replicate2 | Replicate 3 |
|----------------------------------------|----------------|-------------------|-------------|------------|-------------|
| <i>B. anthracis</i> Ames<br>Endospores | Product        | Percontact Sb Ex1 | 8.60E+06    | 8.70E+06   | 8.30E+06    |
|                                        |                | Percontact Sb Ex2 | 7.60E+06    | 6.80E+06   | 7.20E+06    |
|                                        |                | Percontact Sb Ex3 | 8.00E+06    | 8.30E+06   | 7.80E+06    |
|                                        |                | T2 Ex1            | 4.00E+03    | 8.00E+03   | 1.10E+04    |
|                                        |                | T2 Ex2            | 1.00E+04    | 8.60E+04   | 4.00E+04    |
|                                        |                | T2 Ex3            | 1.00E+03    | 8.00E+04   | 7.00E+04    |
|                                        |                | T5 Ex1            | TFTC        | TFTC       | TFTC(8)     |
|                                        |                | T5 Ex2            | TFTC        | 1.50E+01   | TFTC        |
|                                        |                | T5 Ex3            | TFTC        | 1.20E+01   | TFTC        |
|                                        |                | T10 Ex1           | TFTC        | TFTC       | TFTC        |
|                                        |                | T10 Ex2           | TFTC        | TFTC       | TFTC        |
|                                        |                | T10 Ex3           | TFTC        | TFTC       | TFTC        |
|                                        |                | T30 Ex1           | TFTC        | TFTC       | TFTC        |
|                                        |                | T30 Ex2           | TFTC        | TFTC       | TFTC        |
|                                        |                | T30 Ex3           | TFTC        | TFTC       | TFTC        |
|                                        | PBS            | 30 minutes ex1    | 7.60E+06    | 8.60E+06   | 8.30E+06    |
|                                        |                | 30mins ex2        | 8.00E+06    | 8.20E+06   | 8.40E+06    |
|                                        |                | 30 mins ex3       | 9.20E+06    | 8.20E+06   | 8.50E+06    |

| Microorganism                           | Test substance | Contact time      | Replicate 1 | Replicate 2 | Replicate 3 |
|-----------------------------------------|----------------|-------------------|-------------|-------------|-------------|
| <i>B. anthracis</i> Stern<br>Endospores | Bleach         | Percontact Sb Ex1 | 6.50E+06    | 6.60E+06    | 7.30E+06    |
|                                         |                | Percontact Sb Ex2 | 9.50E+06    | 1.09E+07    | 1.06E+07    |
|                                         |                | Percontact Sb Ex3 | 1.54E+07    | 1.41E+07    | 1.60E+07    |
|                                         |                | T2 Ex1            | 3.00E+04    | 1.80E+04    | 3.80E+04    |
|                                         |                | T2 Ex2            | 1.00E+04    | 1.00E+04    | 0.00E+00    |
|                                         |                | T2 Ex3            | 7.00E+04    | 6.20E+04    | 3.60E+04    |
|                                         |                | T5 Ex1            | 4.90E+01    | 1.79E+02    | 6.30E+01    |
|                                         |                | T5 Ex2            | TFTC        | TFTC        | TFTC        |
|                                         |                | T5 Ex3            | TFTC (7)    | 30          | TFTC        |
|                                         |                | T10 Ex1           | TFTC        | TFTC        | TFTC        |
|                                         |                | T10 Ex2           | TFTC        | TFTC        | TFTC        |
|                                         |                | T10 Ex3           | TFTC        | TFTC        | TFTC        |
|                                         |                | T30               | TFTC        | TFTC        | TFTC        |
|                                         |                | T30               | TFTC        | TFTC        | TFTC        |
|                                         |                | T30               | TFTC        | TFTC        | TFTC        |
|                                         | PBS            | 0 minutes ex 2    | 1.09E+07    | 1.13E+07    | 1.01E+07    |
|                                         |                | 0.5 minutes ex 1  | 9.20E+06    | 1.00E+07    | 1.11E+07    |
|                                         |                | 0 minutes ex 3    | 1.47E+07    | 1.43E+07    | 1.77E+07    |
|                                         |                | 0 minutes ex 4    | 1.48E+07    | 1.40E+07    | 1.31E+07    |
|                                         |                | 2 minutes ex 2    | 1.15E+07    | 1.07E+07    | 1.03E+07    |
|                                         |                | 2 minutes ex 3    | 1.74E+07    | 1.51E+07    | 1.74E+07    |
|                                         |                | 2 minutes ex 4    | 1.61E+07    | 1.31E+07    | 1.50E+07    |
|                                         |                | 5 minutes ex 2    | 6.30E+06    | 6.90E+06    | 7.20E+06    |
|                                         |                | 5 minutes ex 3    | 1.32E+07    | 2.02E+07    | 1.56E+07    |
|                                         |                | 5 minutes ex 4    | 1.21E+07    | 1.81E+07    | 2.04E+07    |
|                                         |                | 10 minutes ex 1   | 6.30E+06    | 7.80E+06    | 7.00E+06    |
|                                         |                | 10 minutes ex 3   | 1.63E+07    | 1.50E+07    | 1.53E+07    |
| 10 minutes ex 4                         | 1.58E+07       | 1.53E+07          | 1.57E+07    |             |             |

| Microorganism                          | Test substance | Contact time      | Replicate 1 | Replicate2 | Replicate 3 |
|----------------------------------------|----------------|-------------------|-------------|------------|-------------|
| <i>B. anthracis</i> Ames<br>Endospores | bleach         | Percontact Sb Ex1 | 7.50E+06    | 8.30E+06   | 8.70E+06    |
|                                        |                | Percontact Sb Ex2 | 8.30E+06    | 8.60E+06   | 8.30E+06    |
|                                        |                | Percontact Sb Ex3 | 8.50E+06    | 5.00E+05   | 5.00E+06    |
|                                        |                | T2 Ex1            | 4.00E+03    | 6.00E+03   | 8.00E+03    |
|                                        |                | T2 Ex2            | 1.00E+04    | 1.00E+04   | 1.00E+04    |
|                                        |                | T2 Ex3            | 3.00E+04    | 4.10E+04   | 3.20E+04    |
|                                        |                | T5 Ex 1           | TFTC        | 3.00E+01   | 8.00E+01    |
|                                        |                | T5 Ex2            | 4.90E+02    | 8.70E+02   | 6.30E+02    |
|                                        |                | T5 Ex3            | 2.20E+02    | 3.40E+02   | 4.50E+02    |
|                                        |                | T10 Ex1           | TFTC        | TFTC       | TFTC        |
|                                        |                | T10 Ex2           | TFTC        | TFTC       | TFTC        |
|                                        |                | T10 Ex3           | TFTC        | TFTC       | TFTC        |
|                                        |                | T30 Ex1           | TFTC        | TFTC       | TFTC        |
|                                        |                | T30 Ex2           | TFTC        | TFTC       | TFTC        |
|                                        |                | T30 Ex3           | TFTC        | TFTC       | TFTC        |
|                                        | PBS            | 0 minutes ex1     | 8.20E+06    | 7.90E+06   | 5.50E+06    |
|                                        |                | 0 minutes ex2     | 5.80E+06    | 8.50E+06   | 7.20E+06    |
|                                        |                | 0 mins ex3        | 7.60E+06    | 7.20E+06   | 7.40E+06    |
|                                        |                | 2 minutes ex1     | 6.50E+06    | 5.80E+06   | 6.40E+06    |
|                                        |                | 5 minutes ex1     | 5.60E+06    | 6.20E+06   | 5.20E+06    |
|                                        |                | 5 minutes ex 2    | 8.60E+06    | 8.70E+06   | 8.50E+06    |
|                                        |                | 10minutes ex1     | 7.10E+06    | 5.00E+06   | 6.60E+06    |
|                                        |                | 10 minutes ex2    | 7.80E+06    | 6.30E+06   | 6.70E+06    |
|                                        | 10 minutes ex3 | 8.20E+06          | 8.40E+06    | 8.90E+06   |             |

| Microorganism                            | Test substance            | Contact time          | Replicate 1 | Replicate2 | Replicate 3 |
|------------------------------------------|---------------------------|-----------------------|-------------|------------|-------------|
| <i>B. anthracis</i> Sterne<br>Endospores | Product<br>Plus D/E broth | Percontact Sb Ex1     | 1.42E+07    | 1.20E+07   | 1.32E+07    |
|                                          |                           | Percontact Sb Ex2     | 1.18E+07    | 2.40E+07   | 1.80E+07    |
|                                          |                           | Percontact Sb Ex3     | 1.22E+07    | 1.78E+07   | 1.56E+07    |
|                                          |                           | T2 Ex1                | 5.50E+03    | 4.20E+03   | 4.20E+03    |
|                                          |                           | T2 Ex2                | 1.30E+04    | 5.00E+03   | 6.80E+03    |
|                                          |                           | T2 Ex3                | 6.90E+03    | 3.80E+03   | 5.60E+03    |
|                                          |                           | T5 Ex1                | 4.10E+01    | 1.22E+02   | 3.20E+02    |
|                                          |                           | T5 Ex2                | 6.60E+02    | 6.00E+02   | 7.20E+02    |
|                                          |                           | T5 Ex3                | 6.70E+01    | 2.70E+02   | 1.30E+02    |
|                                          |                           | T10 Ex1               | TFTC        | TFTC       | TFTC        |
|                                          | T10 Ex 2                  | TFTC                  | TFTC        | TFTC       |             |
|                                          | T10 Ex3                   | TFTC                  | TFTC        | TFTC       |             |
|                                          | T30 Ex 1                  | TFTC                  | TFTC        | TFTC       |             |
|                                          | T30 Ex 2                  | TFTC                  | TFTC        | TFTC       |             |
|                                          | T30 Ex 3                  | TFTC                  | TFTC        | TFTC       |             |
|                                          | PBS                       | 0 minutes ex1         | 6.00E+06    | 3.00E+06   | 7.40E+06    |
|                                          |                           | 10minutes ex2         | 3.60E+06    | 8.00E+05   | 5.40E+06    |
|                                          |                           | 30minutes ex3         | 2.12E+06    | 3.00E+06   | 4.20E+06    |
|                                          | Product + D/E broth       | Product + D/E (30min) | 3.00E+06    | 4.00E+06   | 6.00E+06    |
|                                          |                           | Control               | 5.60E+06    | 5.47E+06   | 5.50E+06    |

| Microorganism                           | Test substance            | Contact time          | Replicate 1   | Replicate2 | Replicate 3 |          |
|-----------------------------------------|---------------------------|-----------------------|---------------|------------|-------------|----------|
| <i>B. anthracis</i> Stern<br>Endospores | bleach<br>plus D/E Quench | Percontact Sb Ex1     | 1.42E+07      | 1.20E+07   | 1.30E+07    |          |
|                                         |                           | Percontact Sb EX2     | 1.18E+07      | 2.40E+07   | 1.90E+07    |          |
|                                         |                           | Percontact Sb Ex3     | 2.40E+07      | 2.80E+07   | 2.20E+07    |          |
|                                         |                           | T2 Ex1                | 2.80E+04      | 3.70E+04   | 5.60E+04    |          |
|                                         |                           | T2 Ex2                | 1.10E+04      | 5.50E+04   | 8.10E+04    |          |
|                                         |                           | T2 Ex3                | 3.30E+04      | 2.70E+04   | 4.40E+03    |          |
|                                         |                           | T5 Ex1                | 4.70E+02      | 7.00E+02   | 4.20E+02    |          |
|                                         |                           | T5 Ex 2               | 3.20E+02      | 2.80E+02   | 8.90E+02    |          |
|                                         |                           | T5 Ex3                | 4.50E+02      | 4.80E+02   | 5.30E+02    |          |
|                                         |                           | T10 Ex1               | TFTC          | TFTC       | TFTC        |          |
|                                         |                           | T10 Ex2               | TFTC          | TFTC       | TFTC        |          |
|                                         |                           | T10 Ex3               | TFTC          | TFTC       | TFTC        |          |
|                                         |                           | T30 Ex 1              | TFTC          | TFTC       | TFTC        |          |
|                                         |                           | T30 Ex 2              | TFTC          | TFTC       | TFTC        |          |
|                                         |                           | T30 Ex 3              | TFTC          | TFTC       | TFTC        |          |
|                                         |                           | PBS                   | 0 minutes ex1 | 6.00E+06   | 3.70E+06    | 7.40E+06 |
|                                         |                           |                       | 10minutes ex2 | 3.60E+06   | 8.20E+05    | 7.20E+06 |
|                                         | 30minutes ex3             |                       | 2.12E+06      | 3.10E+06   | 6.10E+06    |          |
|                                         | Bleach + D/E              | Bleach + D/E (30 min) | 5.30E+06      | 4.90E+06   | 4.70E+06    |          |
|                                         |                           | Control               | 5.20E+06      | 5.80E+06   | 5.30E+06    |          |
